# Supplementary material for: Comparative Personality Traits Assessment of Three Species of Communally Housed Captive Penguins
Source: Animals (Basel). 2019 Jun 20;9(6):376. doi: 10.3390/ani9060376 (PMC6616866; doi:10.3390/ani9060376)
Supplement: Supplementary file 1 [file animals-09-00376-s001.pdf]

# Supplementary Files: Comparative Personality Traits Assessment of Three Species of Communally Housed Captive Penguins

Giovanni Quintavalle Pastorino <sup>1</sup>, Richard Preziosi <sup>2</sup>, Massimo Faustini <sup>1</sup>, Giulio Curone <sup>1</sup>, Mariangela Albertini <sup>1</sup>, Dawn Nicoll <sup>3</sup>, Lorna Moffat <sup>3</sup>, Romain Pizzi <sup>3</sup> and Silvia Mazzola <sup>1,\*</sup>

**Table S1.** Animals involved in the study, K as king penguin (*Aptenodytes patagonicus*), NR as northren rockhopper (*Eudyptes moseley*) and G as gentoo penguin (*Pygoscelis papua*).

| Identification Code  | Penguin Name | Band Color/Side    | Species | Date of Birth | Gender | Rearing History |
|----------------------|--------------|--------------------|---------|---------------|--------|-----------------|
| 88HB7/27,655,951     | Blue         | Blue               | K       | 08/30/1988    | Male   | Parent reared   |
| B04C01/10.443,092    | Nils         | Purple R           | K       | 07/30/2002    | Male   | Hand reared     |
| B04H07/27,655,863    | Fingal       | White R            | K       | 08/15/2004    | Male   | Parent reared   |
| B09J02/27,701,744    | Maclean      | Red/Yellow R       | K       | 10/22/2009    | Male   | Unknown         |
| B13K01/BQK1200636    | Bow          | Red/Green R        | K       | 09/14/2012    | Male   | Parent reared   |
| B14K02/25,462,691    | Yoe pie      | Gold R             | K       | 09/22/1997    | Male   | Parent reared   |
| B16L01/QQT1501700    | Alfie        | Lt, Blue/Green R   | K       | 07/18/2015    | Male   | Parent reared   |
| B17B01/BQK15-1257    | Kongo        | Orange R           | K       | 08/28/2015    | Male   | Unknown         |
| B15J03/QQT1401498    | Dennis       | Black/Red R        | K       | 07/17/2014    | Male   | Unknown         |
| 870514/27655853      | Mrs Wolowitz | Ora/White L        | NR      | 05/13/1987    | Female | Parent reared   |
| 89EB9/27,655,851     | Mrs White    | White L            | NR      | 03/05/1989    | Female | Parent reared   |
| 91EB03/17,397,775    | Helena       | Dk, Blue/White L   | NR      | 05/05/1991    | Female | Parent reared   |
| B06J03/27655870      | Dwayne       | Pink/Green R       | NR      | 04/29/1988    | Male   | Parent reared   |
| B06J07/27655871      | Nestor       | Dk, Blue/Pink R    | NR      | 08/04/1993    | Male   | Parent reared   |
| B08D03/27,655,862    | Tristan      | Lt, Blue/Yell R    | NR      | 04/26/2008    | Male   | Parent reared   |
| B09D08/MIG1228158516 | Eddie        | Black/Green R      | NR      | 04/27/2009    | Male   | Parent reared   |
| B09D12/MIG1228158533 | Issy         | Lt, Blue/Yellow L  | NR      | 04/29/2009    | Female | Parent reared   |
| B12B01/MIG1230087409 | Gordon       | Brown/Gold R       | NR      | 09/04/2008    | Male   | Unknown         |
| B12B02/MIG1230087410 | Isla         | Gold/Pink L        | NR      | 04/14/2009    | Female | Hand reared     |
| B12B03/26,295,973    | Millie       | Gold/Yellow L      | NR      | 04/16/2009    | Female | Hand reared     |
| B12B04/ZBQ12-01319   | Al           | Gold/Orange R      | NR      | 01/05/2010    | Male   | Hand reared     |
| B12B05/ZBQ1201320    | Balboa       | Gold/Pink R        | NR      | 04/23/2010    | Male   | Parent reared   |
| B12B06/ZBQ12-01321   | Jura         | Gold/Yellow R      | NR      | 04/21/2010    | Male   | Parent reared   |
| B12B07/ZBQ12-01322   | Wesley       | Gold/White R       | NR      | 04/28/2010    | Male   | Parent reared   |
| B12B08/ZBQ12-01323   | Bruce        | Dk Blue/Gold R     | NR      | 04/21/2011    | Male   | Parent reared   |
| B12B09/ZBQ12-01324   | Penny        | Brown/Gold L       | NR      | 04/21/2011    | Female | Parent reared   |
| B12B10/ZBQ12-01325   | Pinhead      | Gold/Orange L      | NR      | 04/16/2011    | Female | Parent reared   |
| B12B11/ZBQ12-01326   | Amy          | Gold/White L       | NR      | 04/24/2011    | Female | Parent reared   |
| B12B12/ZBQ12-01327   | Brucetta     | Dk, Blue/Gold L    | NR      | 04/25/2011    | Female | Parent reared   |
| B17D01/ZBQ17-06348   | Batman       | Gold R             | NR      | 04/25/2017    | Male   | Parent reared   |
| 90EB77/26,975,204    | Boy          | Blue/Ora/Yell R    | G       | 05/20/1990    | Male   | Parent reared   |
| 91EB39/26,774,871    | Mrs Spain    | Orange/White L     | G       | 05/19/1991    | Female | Parent reared   |
| 94EB32/25,263,018    | BB           | Dk, Blue/Lt,Blue L | G       | 01/05/1994    | Female | Parent reared   |
| 96DB11/22,765,004    | Snowflake    | Unbanded           | G       | 04/30/1996    | Male   | Parent reared   |
| 97EB33/2,744,168     | Mary         | Dk, Blue/Red L     | G       | 12/05/1997    | Female | Parent reared   |
| 98DB10/26,975,197    | Mrs Colin    | Lt, Blue/Grey L    | G       | 04/28/1998    | Female | Parent reared   |
| 98EB19/26,975,193    | Colin        | Dk, Blue/Yellow R  | G       | 03/05/1998    | Male   | Parent reared   |
| B00E18/MIG1228158458 | Boo          | Lt, Blue/White L   | G       | 05/27/2000    | Female | Parent reared   |
| B01E01/26,774,831    | Poppet       | Dk blue/White L    | G       | 12/05/2001    | Female | Parent reared   |
| B02E07/26774894      | Dolores      | Grey/white L       | G       | 05/16/2002    | Female | Parent reared   |
| B03E07/26,975,202    | Buzz         | Lt, blue/grey R    | G       | 12/05/2003    | Male   | Parent reared   |
| B04E05/26,774,874    | Mr Spain     | Red/yellow R       | G       | 05/15/2004    | Male   | Parent reared   |
| B16D02/JFQ15-07182   | Chip         | Orange/yellow R    | G       | 07/07/2015    | Male   | Unknown         |
| B16E11/ZBQ16-06160   | Kevin        | Gold R             | G       | 12/05/2016    | Male   | Hand reared     |

**Table S2.** Personality traits included in the questionnaire, that had been rated by the keepers.

| <b>Personality Trait</b>        | <b>Description of the Trait Characteristic</b>                                                                             |
|---------------------------------|----------------------------------------------------------------------------------------------------------------------------|
| Active                          | Moves around enclosure (e.g., walks, runs)                                                                                 |
| Aggressive to conspecifics      | Reacts hostile (e.g., attacks) toward other penguins                                                                       |
| Aggressive to familiar people   | Reacts hostile and threatening towards familiar people and staff members                                                   |
| Aggressive to keepers           | Reacts hostile and threatening towards keepers                                                                             |
| Aggressive to unfamiliar people | Reacts hostile and threatening towards unfamiliar staff and members of the public                                          |
| Aggressive to you               | Reacts hostile and threatening towards you                                                                                 |
| Calm                            | Not easily disturbed by changes in the environment                                                                         |
| Cooperative                     | Is compliant; willingly behaves when asked to do something (e.g., during training)                                         |
| Curious                         | Approaches and explores changes in the environment (e.g., enriching and novel objects)                                     |
| Dominant                        | Dominant to conspecifics: in a commanding or elevated position compared to conspecifics                                    |
| Eccentric                       | Shows stereotypic or unusual behaviors                                                                                     |
| Excitable                       | Overreacts to changes in the environment                                                                                   |
| Friendly to conspecifics        | Initiates and seems to seek proximity to other penguins                                                                    |
| Friendly to keepers             | Initiates proximity with keepers; approaches barriers readily and in a friendly manner                                     |
| Friendly to familiar people     | Initiates proximity with familiar visitors; approaches fence readily and in a friendly manner                              |
| Friendly to unfamiliar people   | Initiates proximity with unfamiliar visitors; approaches fence readily and in a friendly manner                            |
| Friendly to you                 | Initiates proximity with you; approaches fence readily and in a friendly manner                                            |
| Fearful of conspecifics         | Retreats and hides from other penguins                                                                                     |
| Fearful of familiar people      | Retreats and hides from familiar people and staff members                                                                  |
| Fearful of unfamiliar people    | Retreats and hides from unfamiliar staff and members of the public                                                         |
| Fearful of keepers              | Retreats and hides from keepers                                                                                            |
| Fearful of you                  | Retreats and hides from you                                                                                                |
| Insecure                        | Seems scared easily; “jumpy” and fearful in general                                                                        |
| Playful                         | Initiates and engages in play behavior (seemingly meaningless, non-aggressive behavior) with objects and/or other penguins |
| Self-assured                    | Moves in a seemingly confident, well-coordinated and relaxed manner                                                        |
| Smart                           | Learn quickly to associate certain events and appears to remember for a long time                                          |
| Solitary                        | Spends time alone; avoids company                                                                                          |
| Tense                           | Shows restraint in movement and posture                                                                                    |
| Timid/shy                       | Reluctance to approach other animals, novel objects, or new situations                                                     |
| Vocal: aggressive               | Frequently and readily vocalizes aggressively                                                                              |
| Vocal: non-aggressive           | Frequently and readily vocalizes (friendly or neutral vocalizations)                                                       |

**Table S3.** Kruskal-Wallis non-parametric test analysis of the differences between the median values of the personality traits rated by the keepers in the three species of penguin. Only statistically different results are listed,  $\chi^2$  = chi-square values; df = degree of freedom values,  $p < 0.05$  values are considered as statistically different.

| Kruskal-Wallis             |          |    |       |
|----------------------------|----------|----|-------|
|                            | $\chi^2$ | df | $p$   |
| Active                     | 7884     | 2  | 0.019 |
| Calm                       | 8462     | 2  | 0.015 |
| Curious                    | 5903     | 2  | 0.052 |
| Friendly to other penguins | 8335     | 2  | 0.015 |
| Playful                    | 9696     | 2  | 0.008 |
| Vocal: aggressive          | 9463     | 2  | 0.009 |
